# Supplementary material
Source: Royal Society of Chemistry journal article supplement (doi:10.1039/d6cc02440h)
Supplement: d6cc02440h1.pdf [file d6cc02440h1.pdf]

## *Supporting Information*

### **Cu(I)-cluster-based Covalent Organic Frameworks with Open Metal Sites and Tuned Microporosity for Efficient C<sub>2</sub>H<sub>2</sub>/CO<sub>2</sub> Separation**

Pengyue Hao,<sup>‡a</sup> Jialiang Liu,<sup>‡a</sup> Sen Wang,<sup>a</sup> Shijie Wang,<sup>b</sup> Lulan Xu,<sup>a</sup> Wang Zhang<sup>a</sup> and Yongwu Peng<sup>\*a,b</sup>

<sup>a</sup> College of Materials Science and Engineering, Science and Education Integration College of Energy and Carbon Neutralization, Zhejiang University of Technology, Hangzhou 310014, China

<sup>b</sup> School of Materials Science and Chemical Engineering, Ningbo University, Ningbo 315211, China.

E-mail: ywpeng@zjut.edu.cn; pengyongwu@nbu.edu.cn

‡ These authors contributed equally to this work.

## Table of Contents

|                                                     |    |
|-----------------------------------------------------|----|
| 1. Materials and methods .....                      | 3  |
| 2. Synthesis and characterization .....             | 6  |
| 2.1. Synthesis of monomers.....                     | 6  |
| 2.2. Synthesis of Cu-HAPB and Cu-HABPB .....        | 7  |
| 2.3. Characterization of Cu-HAPB and Cu-HABPB ..... | 9  |
| 3. References .....                                 | 32 |

## 1. Materials and methods

Hexakis(4-aminophenyl)benzene;1,1':2',1''-Terphenyl]-4,4''-diamine, [1,1':4',1'':2'',1''':4''',1''''-Quinquephenyl]-4,4''''-diamine, 1H-Pyrazole-4-carboxaldehyde were purchased from Shanghai Tensus Biotech Co., Ltd.  $\text{Cu}(\text{NO}_3)_2 \cdot 3\text{H}_2\text{O}$ , N, N-dimethylformamide, ethanol, 1-Butanol, N, N-dimethylacetamide (DMA, 99%) were purchased from Tokyo Chemical Industry Co., Ltd., All the materials were used as received without further purification.

**Fourier transform infrared (FT-IR):** IR spectrum was measured on an IR spectrometer (Nicolet 6700) between the ranges of 4000 to 400  $\text{cm}^{-1}$ .

**Solid-state nuclear magnetic resonance (ssNMR):** Solid-state nuclear magnetic resonance (NMR) data were performed on a Bruker AVANCE III 600 spectrometer with cross-polarization magic-angle-spinning (CP/MAS) at a resonance frequency of 150.9 MHz.  $^{13}\text{C}$  CP/MAS NMR spectra were recorded using a 4 mm MAS probe and a spinning rate of 14 kHz. A contact time of 4 ms and a recycle delay of 2 s were used for the  $^{13}\text{C}$  CP/MAS NMR measurement. The chemical shifts of  $^{13}\text{C}$  were externally referenced to tetramethylsilane (TMS).

**X-ray photoelectron spectroscopy (XPS):** XPS spectra were collected using a Thermo Scientific ESCALAB 250Xi spectrometer equipped with a monochromatic Al-K $\alpha$  source.

**Thermogravimetric analysis (TGA):** TGA was performed using a TA Q600. When under flowing  $\text{N}_2$  atmosphere, the samples were heated in a Platinum pan (800 °C, 10 °C  $\text{min}^{-1}$ ) under a  $\text{N}_2$  flux (60 mL  $\text{min}^{-1}$ ).

**Power X-ray diffraction (PXRD):** PXRD patterns were collected on an X-ray diffraction (XRD) system (DX-27mini, China) using Cu K $\alpha$  radiation.

**Scanning electron microscopy (SEM):** SEM images were collected using a GeminiSEM 500 system.

**Transmission electron microscope (TEM):** TEM images were obtained with a Tecnai G2 F30 STwin.

**Sorption isotherm for  $\text{N}_2$ :** Micrometrics ASAP2040 system were used to measure the specific surface area and pore structure using nitrogen as the adsorbate at 77 K, after outgassing the samples overnight at 120 °C.

**Gas sorption:** The samples were activated under vacuum for 12 hours at 120 °C. Gas adsorption experiments at 298 K were performed by using JW-BK200 surface area analyzer. A circulation constant temperature water bath was used to stabilize the temperature at 298 K during the test.

**Crystal structure modeling:** Crystal structure modeling: The unit cell parameters of the COFs were obtained from the indexing of the PXRD peaks using the Dicvol (Reflex module in the Materials Studio program)<sup>1</sup>, the structural modeling of COFs was generated using the Building (Crystal)

module, the lattice model was geometrically optimized using force-field based method (Forcite molecular dynamics module). The Pawley fitting (Reflex module) was performed to optimize the lattice parameters iteratively until the  $R_{wp}$  value converges and the overlay of the observed with refined profiles shows good agreement.

#### Calculation of selectivity via ideal adsorption solution theory (IAST):

The gas adsorption isotherms were first fitted to a dual-site Langmuir-Freundlich (DSLIF) model (eqn (3)), where  $q$  is the amount of adsorbed gas ( $\text{mmol g}^{-1}$ ),  $P$  is the bulk gas phase pressure (atm),  $q_{sat}$  is the saturation amount ( $\text{mmol g}^{-1}$ ),  $b$  is the Langmuir-Freundlich parameter ( $\text{atm}^{-\alpha}$ ), and  $\alpha$  is the Langmuir-Freundlich exponent (dimensionless) for two adsorption sites A and B indicating the presence of weak and strong adsorption sites.

$$q = q_{A,sat} \frac{b_A p}{1 + b_A p} + q_{B,sat} \frac{b_B p}{1 + b_B p} \quad (3)$$

IAST starts from the Raoult's Law type of relationship between the fluid and adsorbed phase (4) and (5), where  $P_i$  is the partial pressure of component  $i$  (atm),  $P$  is the total pressure (atm), and  $y_i$  and  $x_i$  represent mole fractions of component  $i$  in gas and the adsorbed phase (dimensionless).  $P_i^0$  is the equilibrium vapour pressure (atm).

$$P_i = P y_i = P_i^0 x_i \quad (4)$$

$$\sum_{i=1}^n x_i = \sum_{i=1}^n \frac{P_i}{P_i^0} = 1 \quad (5)$$

In IAST,  $P$  is defined by relating to spreading pressure  $\pi$  (6), where  $\pi$  is the spreading pressure,  $S$  is the specific surface area of the adsorbent ( $\text{m}^2 \text{g}^{-1}$ ),  $R$  is the gas constant ( $8.314 \text{ J K}^{-1} \text{ mol}^{-1}$ ),  $T$  is the temperature (K), and  $q_i(P_i)$  is the single component equilibrium obtained from isotherms ( $\text{mmol g}^{-1}$ ).

$$\frac{\pi S}{RT} = \int_0^{p^0} \sum_i \frac{q_i(P_i)}{P_i} dp_i = \Pi(\text{constant}) \quad (6)$$

For a DSLIF model, we have an analytical expression for the integral (7). The isotherm parameters are derived from the previous fitting. For a binary component system, the unknowns will be  $\Pi$ ,  $P$ , and which can be obtained by simultaneously solving eqn (5) and (7).

$$\int_0^{p^0} \sum_i \frac{q_i(P_i)}{P_i} dp_i = \Pi(\text{constant}) = \frac{q_{sat,A}}{a_A} \ln [1 + b_A (P_i^0)^{a_A}] + \frac{q_{sat,B}}{a_B} \ln [1 + b_B (P_i^0)^{a_B}] \quad (7)$$

The adsorbed amount of each compound in a mixture is (8) and (9), where  $q$  is the adsorbed amount of component ( $\text{mmol g}^{-1}$ ), and is the total adsorbed amount ( $\text{mmol g}^{-1}$ ).

$$q_i^{mix} = x_i q_t \quad (8)$$

$$\frac{1}{q_T} = \sum_{i=1}^n \frac{x_i}{q_i(P_i^0)} \quad (9)$$

The adsorption selectivities  $S_{ads}$  were calculated using eqn (10). In this study, IAST calculations were carried out assuming a binary mixed gas with a molar ratio of 50:50 at 298 K and pressures up to 1 atm.

$$S_{ads} = \frac{q_1/q_2}{p_1/p_2} \quad (10)$$

#### Isosteric heat of adsorption ( $Q_{st}$ ):

The isosteric heats of adsorption were calculated using the Clausius-Clapeyron equation:

$$Q_{st} = -R \times \left[ \frac{\partial \ln(P)}{\partial \left(\frac{1}{T}\right)} \right] \quad (11)$$

Where  $R$  is the gas constant constant ( $8.314 \text{ J}\cdot\text{mol}^{-1}\cdot\text{K}^{-1}$ ). Values of  $Q_{st}$  were derived from the slopes of  $\ln P$  versus  $1/T$  plots at different adsorption loadings:

$$Q_{st} = -\text{slope} \times R \quad (12)$$

#### Dynamic Breakthrough experiments:

The breakthrough separation experiment was conducted in a home-built breakthrough apparatus under ambient conditions (298 K, 1 bar). In a typical breakthrough experiment, the activated Cu-HAPB (0.3 g) and Cu-HABPB (about 0.34 g) powders were packed into stainless steel column ( $\Phi 6 \times 80 \text{ mm}$ ) and purged with He flow (20 mL/min) for 4 hours at 298 K for the activation process.

## 2. Synthesis and characterization

### 2.1. Synthesis of monomers

**Scheme S1 Synthesis of Cu(I)-cluster aldehyde.**  $\text{Cu}_3(\text{PA})_3$  was prepared according to a previously reported procedure<sup>2</sup>.  $\text{Cu}(\text{NO}_3)_2 \cdot 3\text{H}_2\text{O}$  (0.20 g, 0.83 mmol) and 1H-pyrazole-4-carbaldehyde (HPyCA, 0.096 g, 1.0 mmol) were dissolved in a mixed solvent of N, N-dimethylformamide (DMF, 6.7 mL), water (5.0 mL), and ethanol (6.7 mL) in a 25 mL sealed flask. The reaction mixture was heated at 100 °C for 12 h, affording white needle-like crystals. The product was collected by filtration, washed thoroughly with ethanol, and dried under vacuum at 50 °C for 12 h to give the final crystalline Cu(I)-cluster aldehyde (yield: 67%).

## 2.2 Synthesis of Cu-HAPB and Cu-HABPB

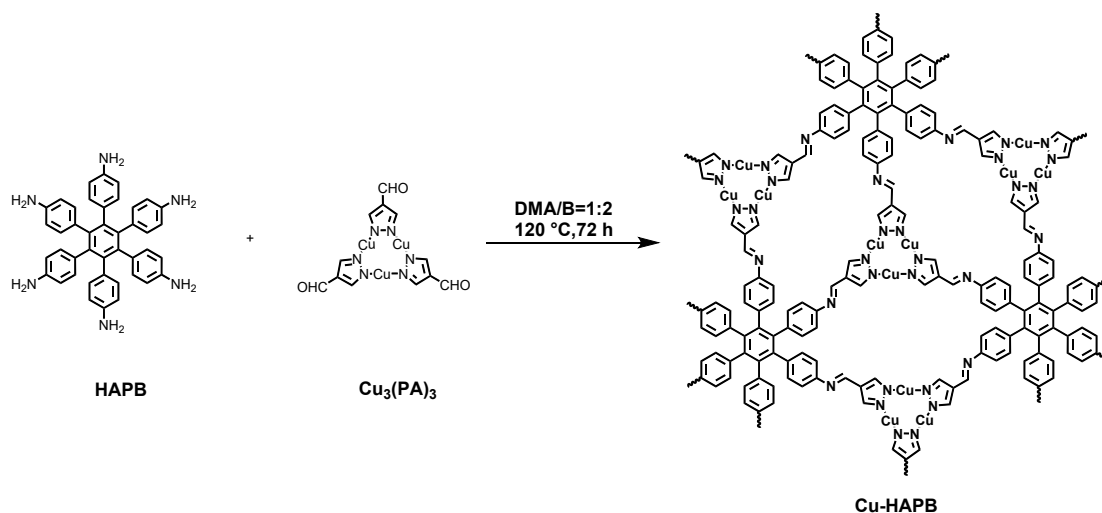

**Scheme S2. Synthesis of Cu-HAPB:** In a 10 mL Pyrex test tube, HAPB (18.72 mg, 0.03 mmol) and  $\text{Cu}_3(\text{PA})_3$  (28.5 mg, 0.06 mmol) were added to a solvent mixture of *N,N*-dimethylacetamide (DMAc, 0.4 mL) and *n*-butanol (0.8 mL). The suspension was sonicated for 5 min to form a homogeneous grey dispersion, followed by addition of 0.12 mL of 9 M acetic acid as catalyst. The reaction mixture was frozen at 77 K, degassed via three freeze-pump-thaw cycles, and flame-sealed under vacuum. The sealed tube was then heated at  $120\text{ }^\circ\text{C}$  for 3 days. After cooling to room temperature, the resulting precipitate was collected by centrifugation (6000 rpm, 3 min), washed with anhydrous acetone, and subjected to solvent exchange with anhydrous tetrahydrofuran. The solid was finally vacuum-dried at  $80\text{ }^\circ\text{C}$  for 12 h to afford Cu-HAPB as a green powder (35.4 mg, 75.3% yield).

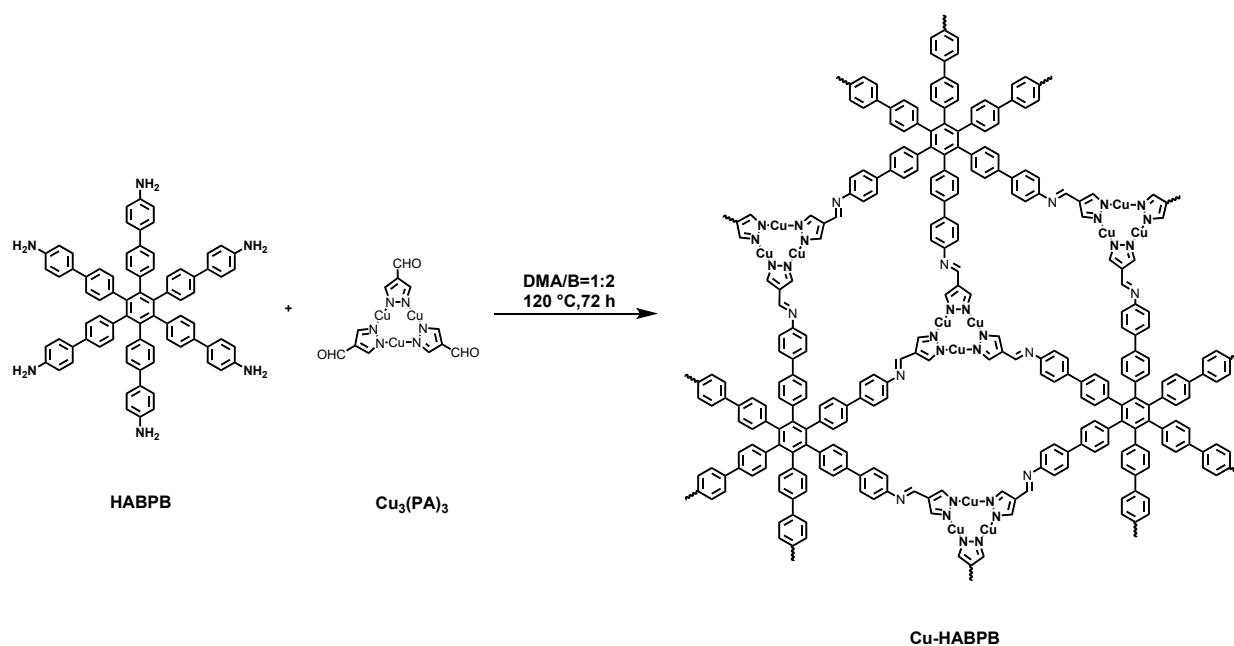

**Scheme S3. Synthesis of Cu-HABPB:** In a 10 mL Pyrex test tube, HABPB (21.5 mg, 0.02 mmol) and Cu<sub>3</sub>(PA)<sub>3</sub> (19 mg, 0.04 mmol) were added to a solvent mixture of N,N-dimethylacetamide (DMAc, 0.4 mL) and *n*-butanol (0.8 mL). The suspension was sonicated for 5 min to form a homogeneous grey dispersion, followed by addition of 0.12 mL of 9 M acetic acid as catalyst. The reaction mixture was frozen at 77 K, degassed via three freeze-pump-thaw cycles, and flame-sealed under vacuum. The sealed tube was then heated at 120 °C for 3 days. After cooling to room temperature, the resulting precipitate was collected by centrifugation (6000 rpm, 3 min), washed with anhydrous acetone, and subjected to solvent exchange with anhydrous tetrahydrofuran. The solid was finally vacuum-dried at 80 °C for 12 h to afford Cu-HABPB as a green powder (29.5 mg, 72.8% yield).

### 2.3. Characterization of Cu-HAPB and Cu-HABPB

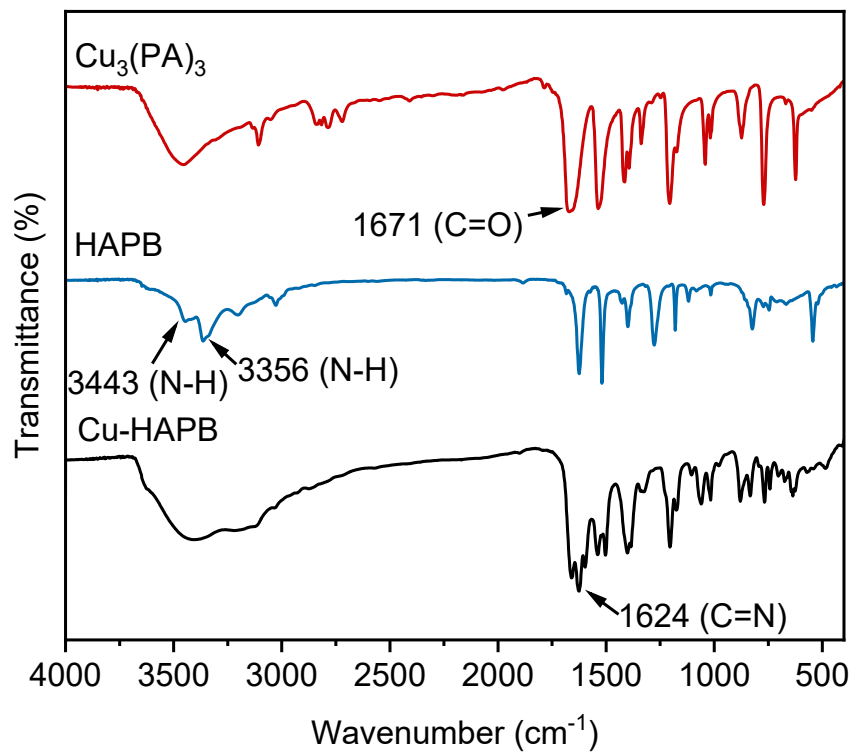

**Figure S1.** FT-IR spectra of Cu<sub>3</sub>(PA)<sub>3</sub>, HAPB, and Cu-HAPB.

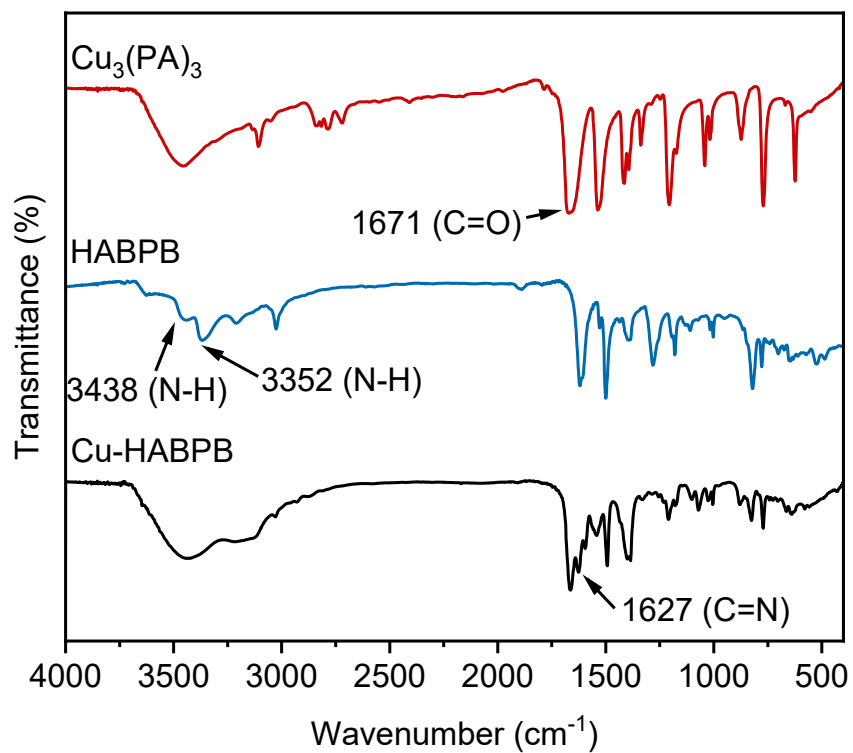

**Figure S2.** FT-IR spectra of  $\text{Cu}_3(\text{PA})_3$ , HABPB, and Cu-HABPB.

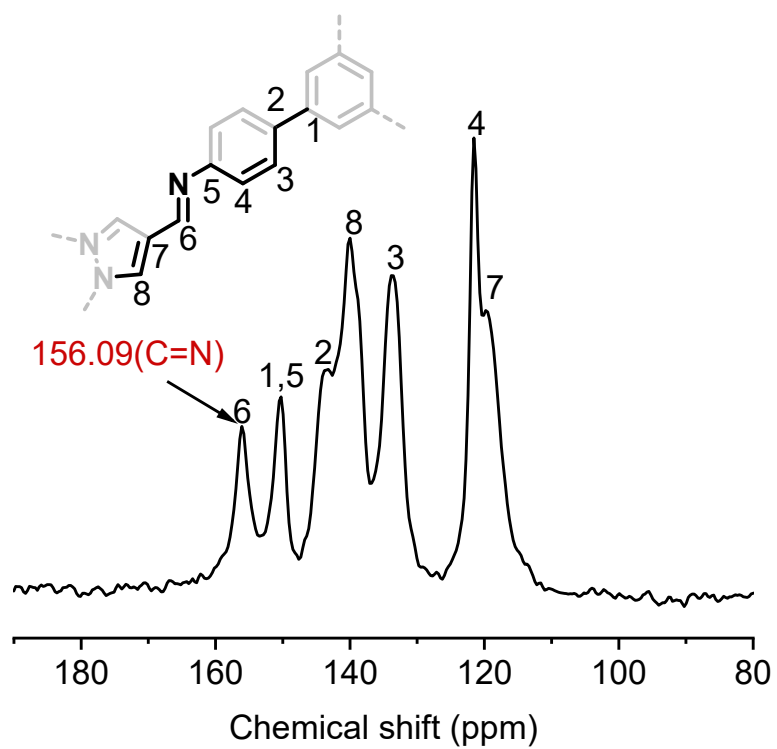

**Figure S3.** Solid-state  $^{13}\text{C}$  CP/MAS NMR spectrum of Cu-HAPB.

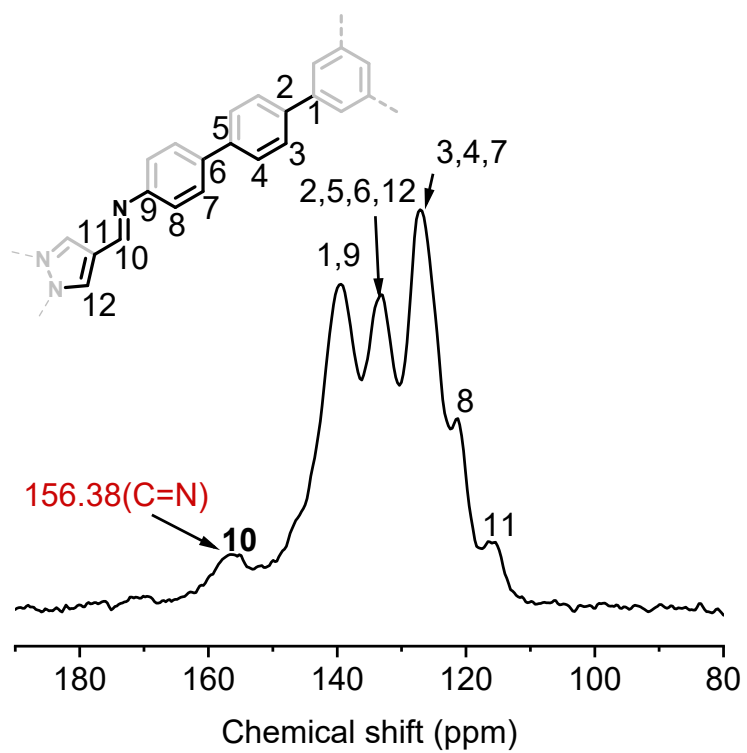

**Figure S4.** Solid-state  $^{13}\text{C}$  CP/MAS NMR spectrum of Cu-HABPB.

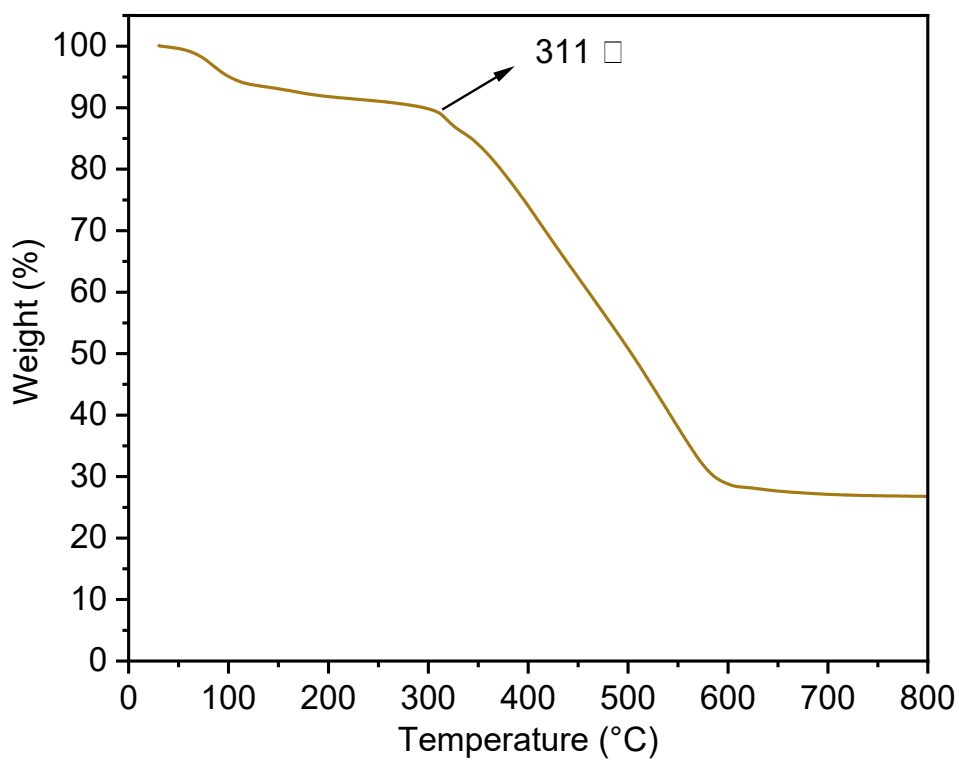

**Figure S5.** TGA curve of Cu-HAPB under N<sub>2</sub> atmosphere conditions.

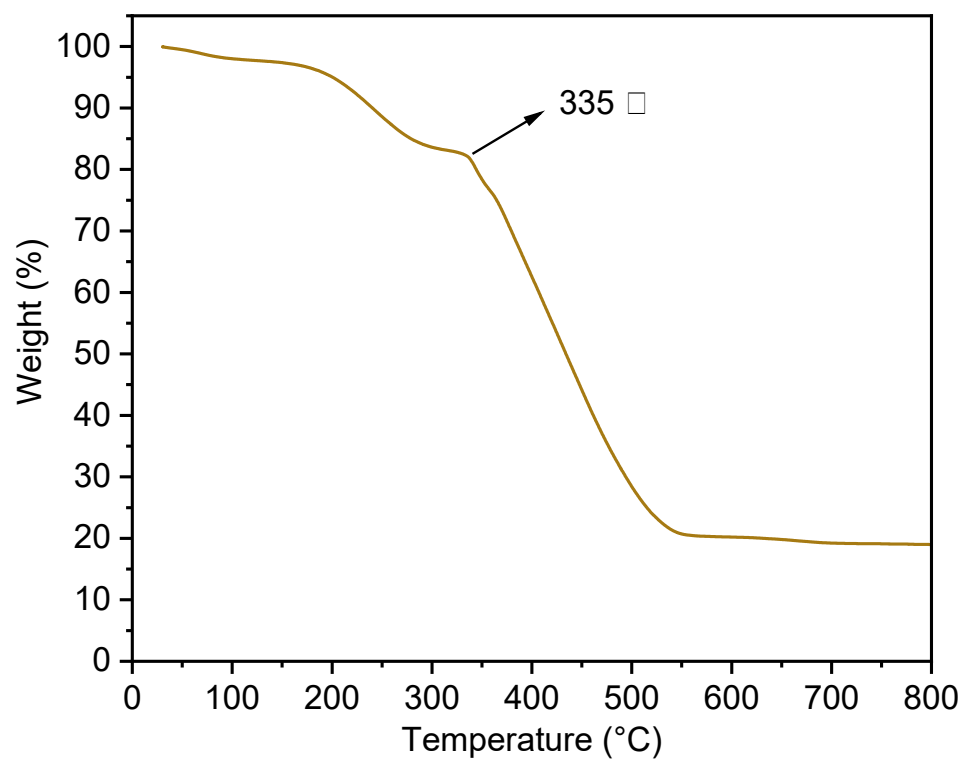

**Figure S6.** TGA curve of Cu-HABPB under N<sub>2</sub> atmosphere conditions.

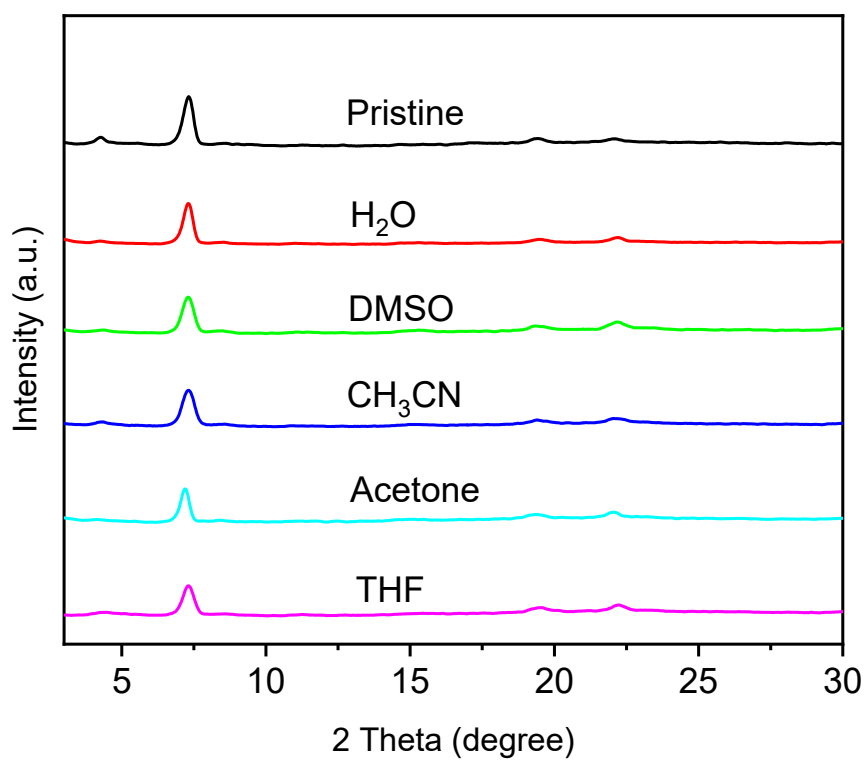

**Figure S7.** PXRD patterns of Cu-HAPB after immersion in various solvents for 72 hours, demonstrating its structural stability.

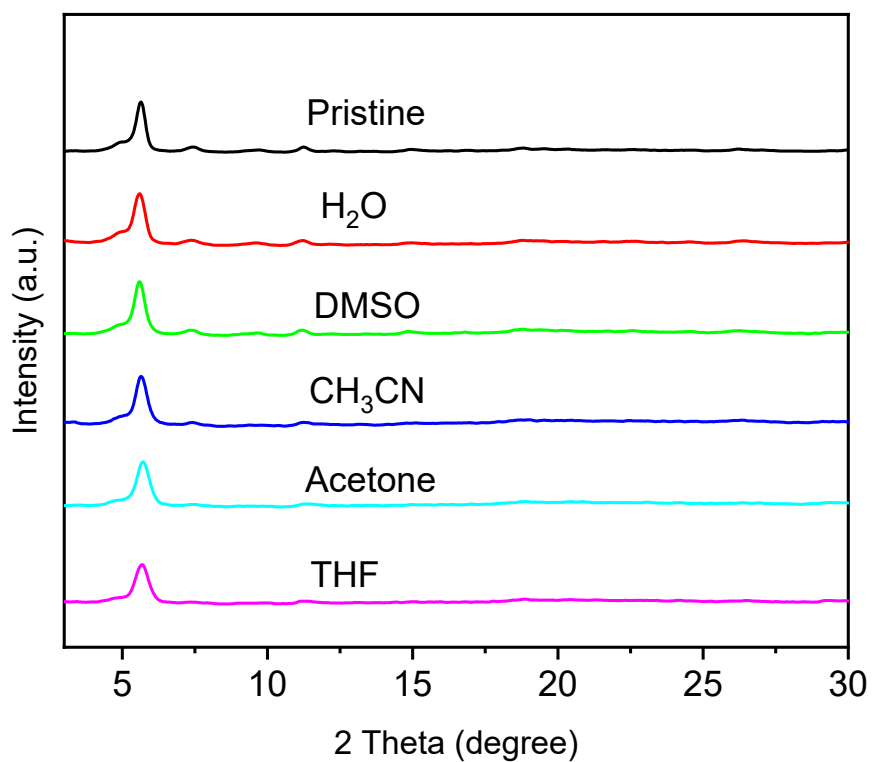

**Figure S8.** PXRD patterns of Cu-HABPB after immersion in various solvents for 72 hours, demonstrating its structural stability.

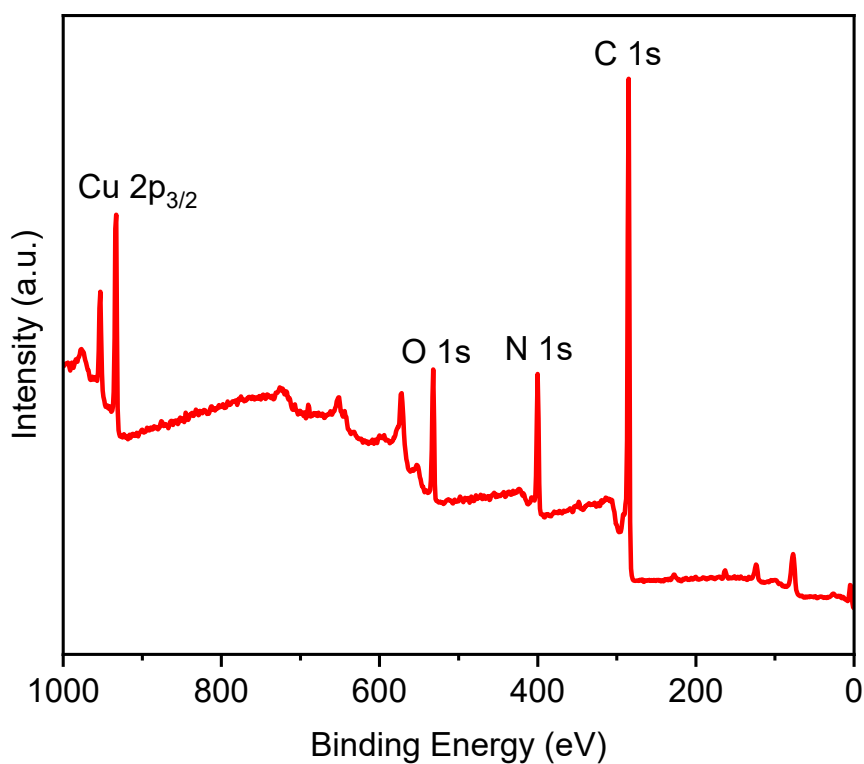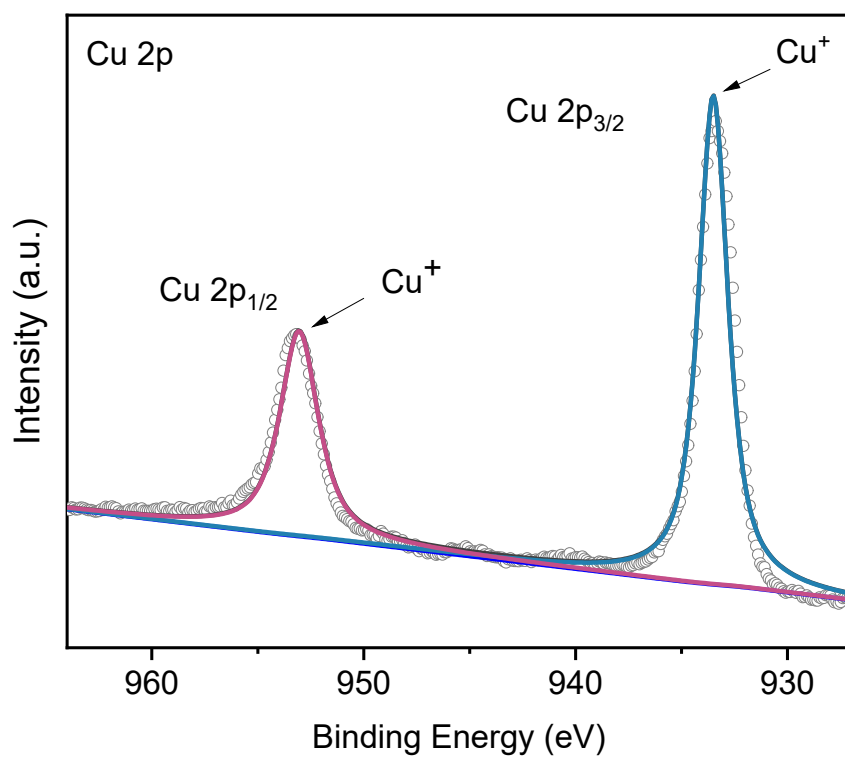

**Figure S9.** XPS survey scan and Cu 2p spectra for Cu-HAPB.

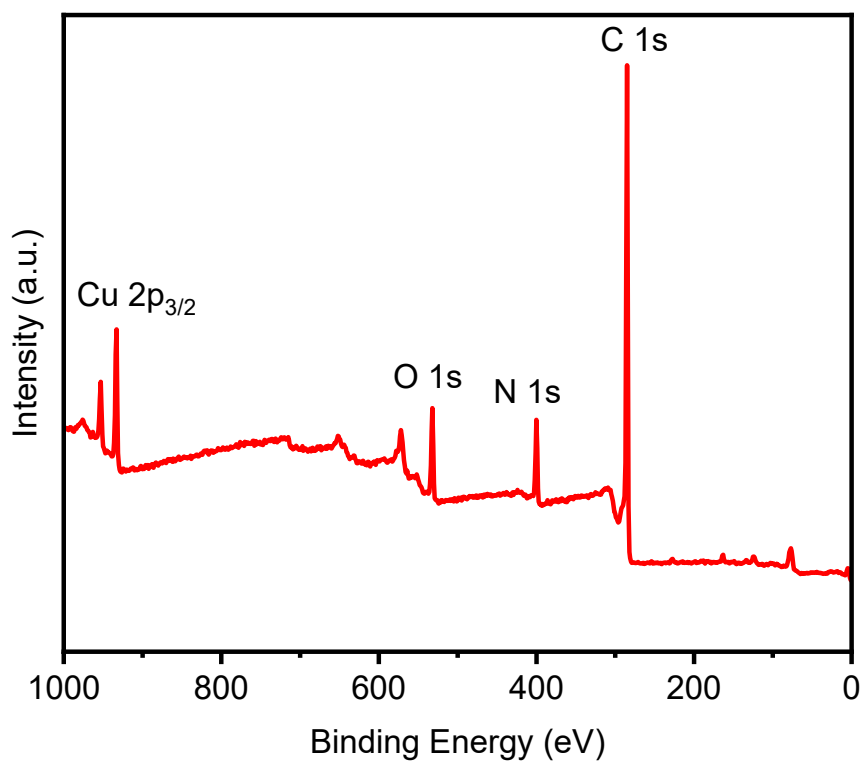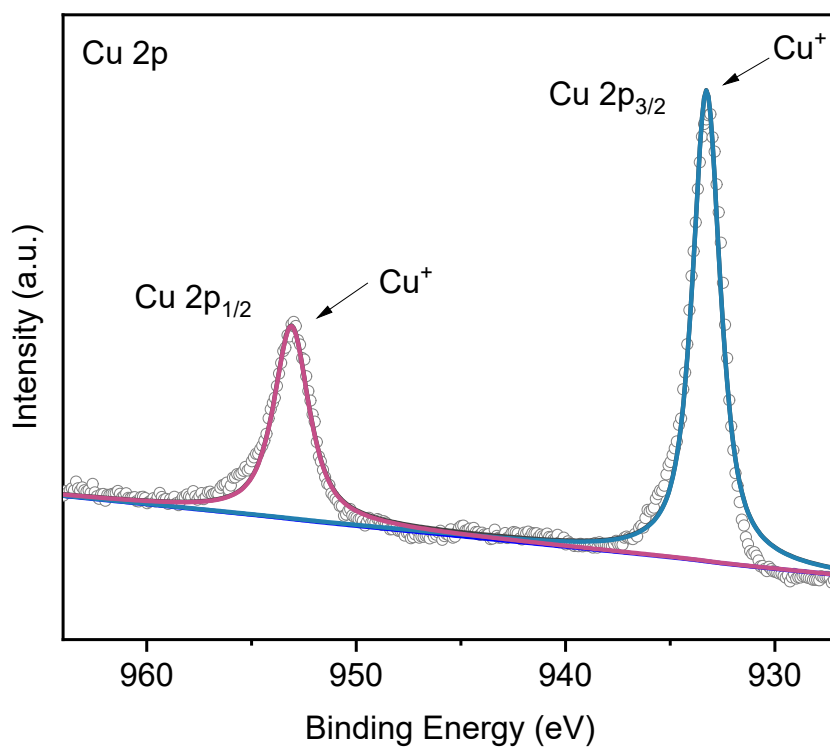

**Figure S10** . XPS survey scan and Cu 2p spectra for Cu-HABPB.

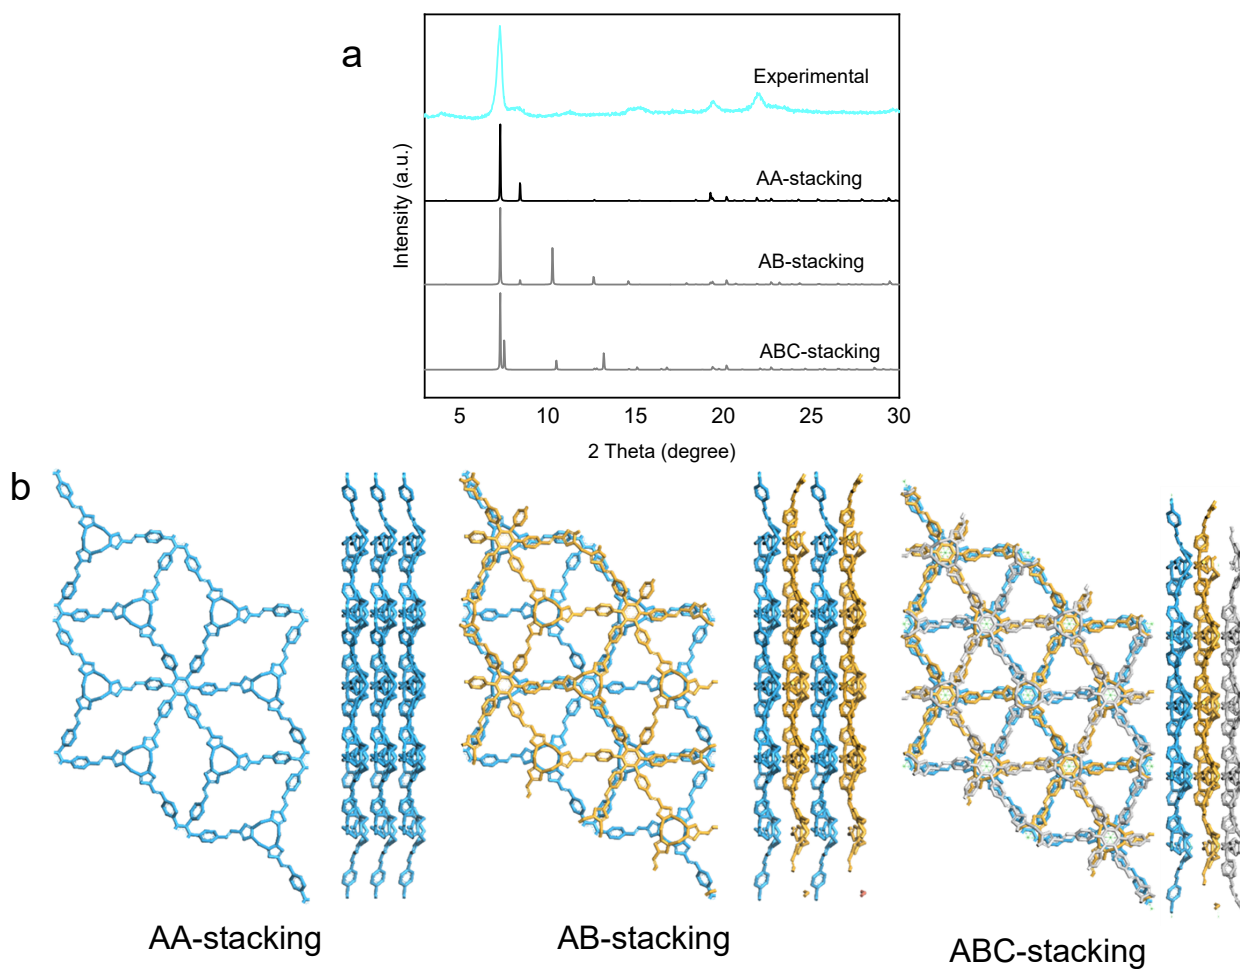

**Figure S11.** (a) PXR D patterns of Cu-HAPB: comparison of the experimental profile with simulated patterns based on AA, AB, and ABC stacking models. (b) Structural models of Cu-HAPB illustrating the AA, AB, and ABC stacking arrangements.

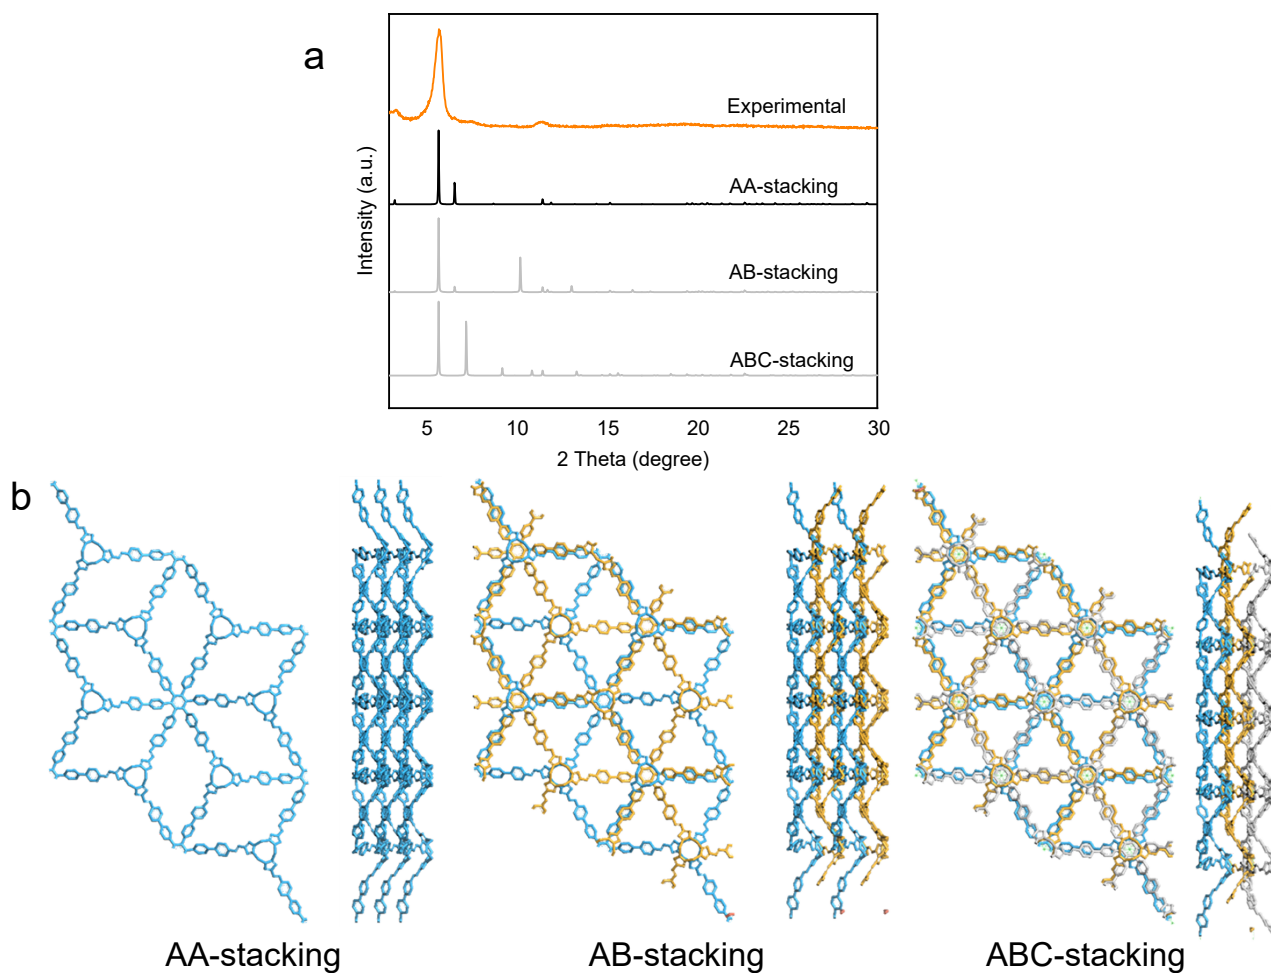

**Figure S12.** (a) PXR D patterns of Cu-HABPB: comparison of the experimental profile with simulated patterns based on AA, AB, and ABC stacking models. (b) Structural models of Cu-HABPB illustrating the AA, AB, and ABC stacking arrangements.

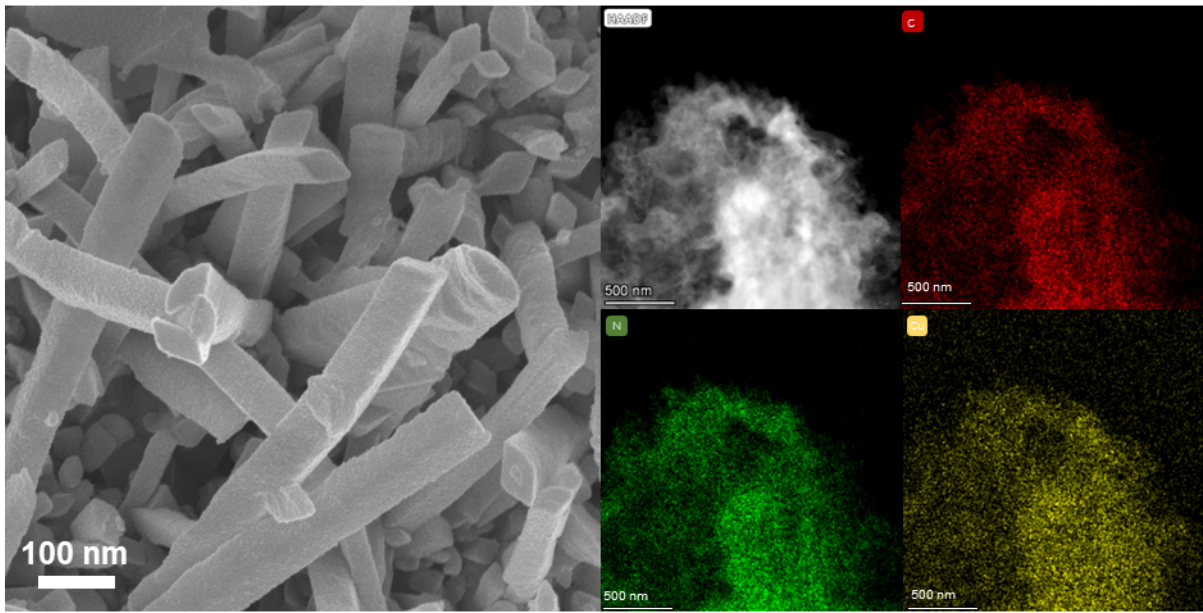

**Figure S13.** SEM image and TEM elemental mapping of Cu-HAPB.

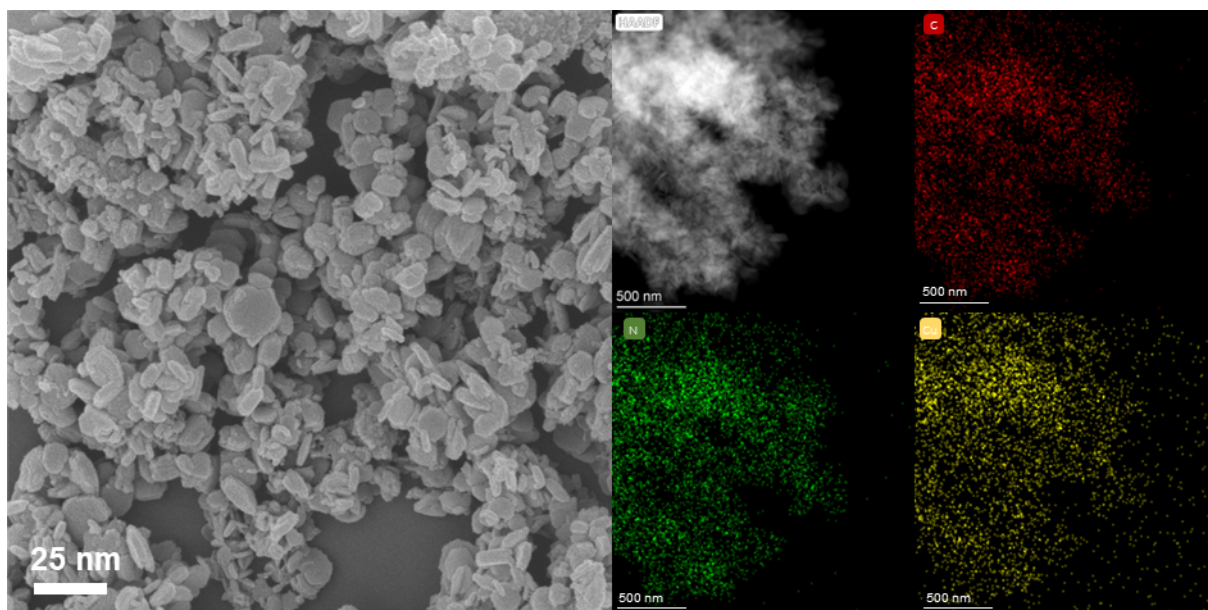

**Figure S14.** SEM image and TEM elemental mapping of Cu-HABPB.

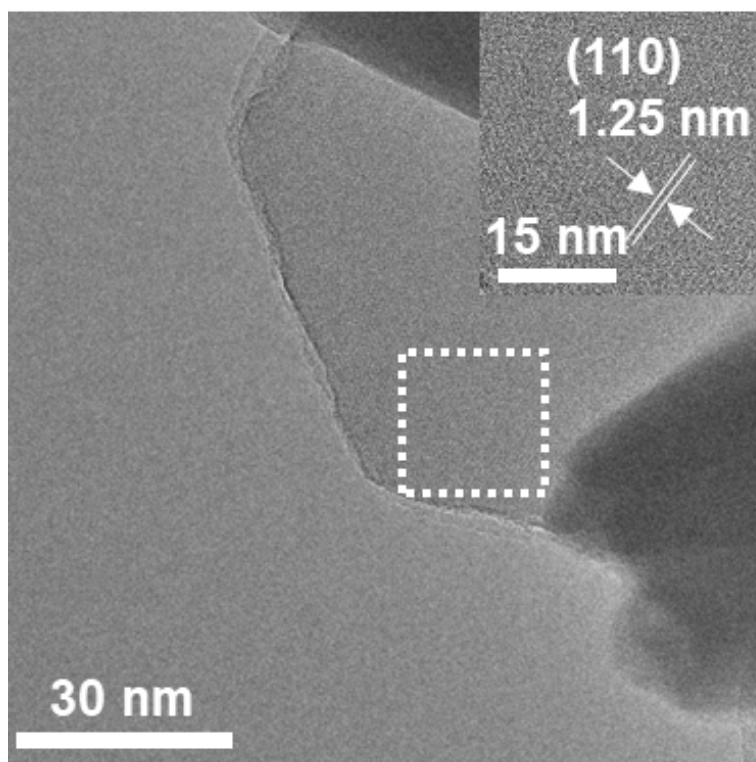

**Figure S15.** TEM image of Cu-HAPB, showing lattice fringes with an interlayer spacing of 1.25 nm indexed to the (110) crystallographic plane.

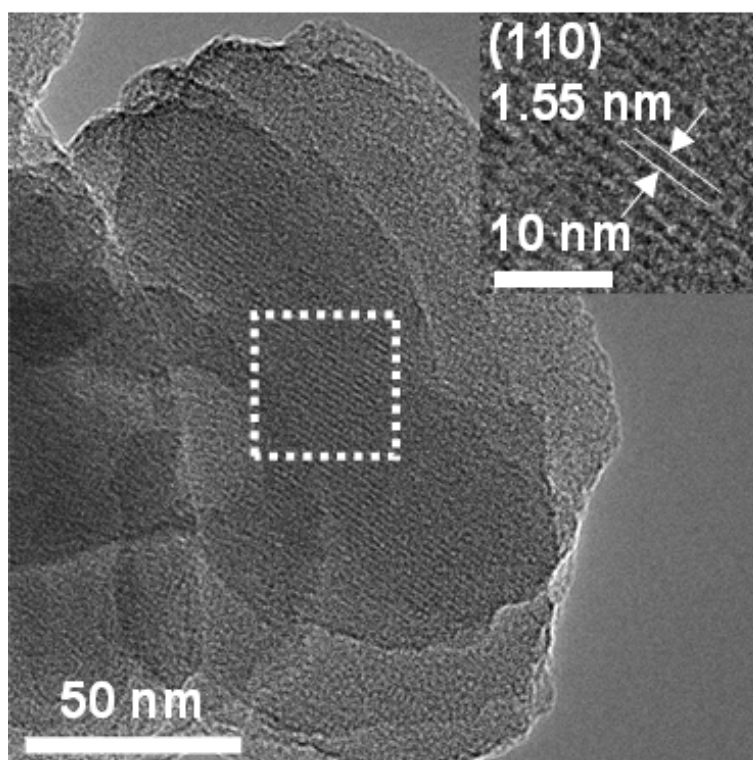

**Figure S16.** TEM image of Cu-HABPB, showing lattice fringes with an interlayer spacing of 1.55 nm indexed to the (110) crystallographic plane.

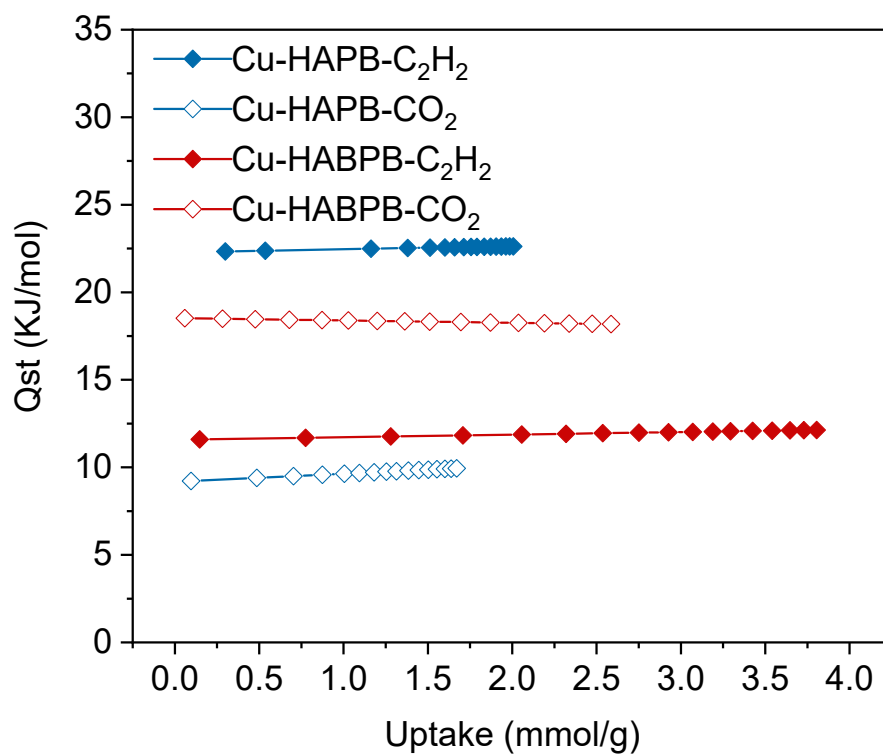

**Figure S17.** Coverage-dependent isosteric heats of adsorption ( $Q_{st}$ ) for  $C_2H_2$  and  $CO_2$  in Cu-HAPB and Cu-HABPB.

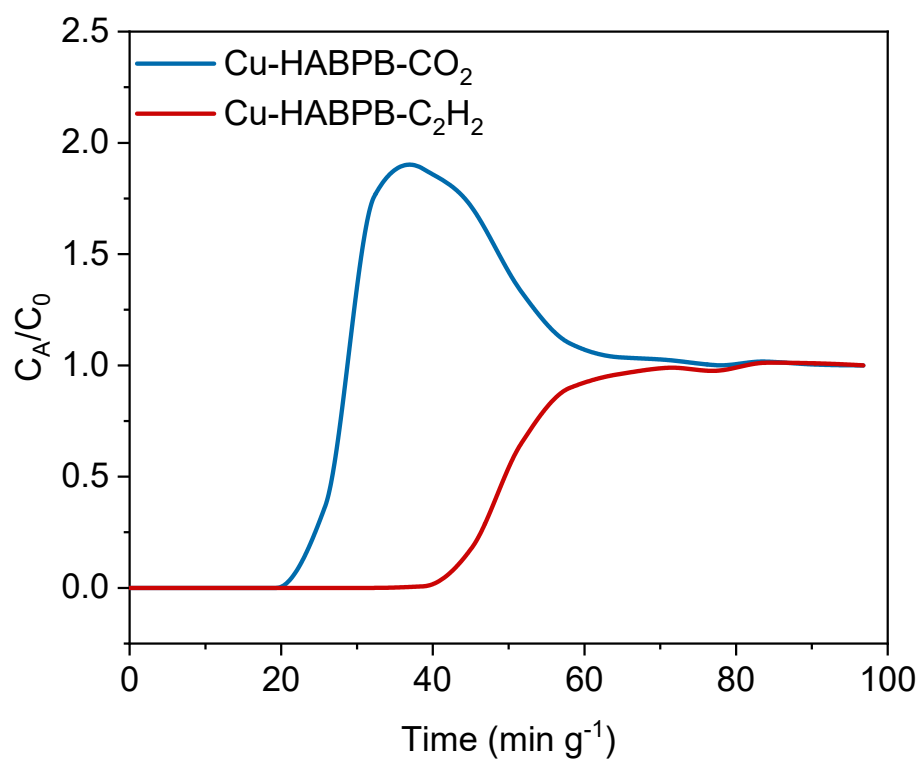

**Figure S18.** Dynamic breakthrough curves for C<sub>2</sub>H<sub>2</sub>/CO<sub>2</sub> separation on Cu-HABPB at 298 K under a total flow rate of 1.0 mL min<sup>-1</sup>.

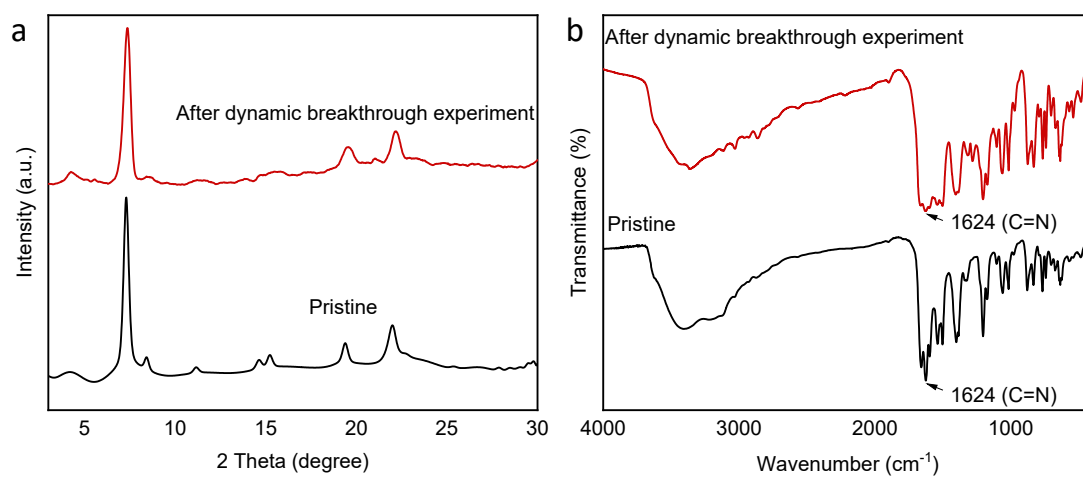

**Figure S19.** (a) PXRD patterns and (b) FT-IR spectra of Cu-HAPB before and after the dynamic breakthrough experiment.

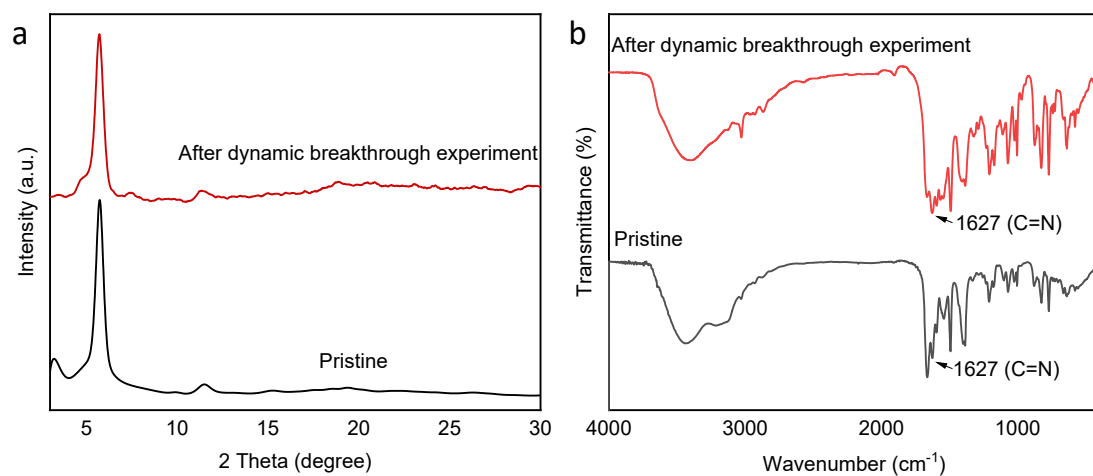

**Figure S20.** (a) PXRD patterns and (b) FT-IR spectra of Cu-HABPB before and after the dynamic breakthrough experiment.

**Table S1.** Unit cell parameters and fractional atomic coordinates of Cu-HAPB derived from structural optimization based on AA stacking with kgd topology.

| Space group          |         | <i>P6</i>                                                                                                                                                        |          |  |
|----------------------|---------|------------------------------------------------------------------------------------------------------------------------------------------------------------------|----------|--|
| Calculated unit cell |         | $a = 24.2256 \text{ \AA}, b = 24.2256 \text{ \AA},$<br>$c = 4.7216 \text{ \AA}$<br>$\alpha = 90.0000^\circ, \beta = 90.0000^\circ,$<br>$\gamma = 120.0000^\circ$ |          |  |
| Atoms                | X       | Y                                                                                                                                                                | Z        |  |
| C1                   | 4.03906 | 1.06972                                                                                                                                                          | -0.71884 |  |
| C2                   | 4.08412 | 1.14375                                                                                                                                                          | -0.68506 |  |
| C3                   | 4.13049 | 1.16848                                                                                                                                                          | -0.46219 |  |
| C4                   | 4.17011 | 1.23701                                                                                                                                                          | -0.41619 |  |
| C5                   | 4.16237 | 1.28233                                                                                                                                                          | -0.5843  |  |
| C6                   | 4.11596 | 1.25852                                                                                                                                                          | -0.80737 |  |
| C7                   | 4.07778 | 1.18966                                                                                                                                                          | -0.85949 |  |
| N8                   | 4.19895 | 1.3515                                                                                                                                                           | -0.50856 |  |
| N9                   | 4.24014 | 1.55549                                                                                                                                                          | -0.24357 |  |
| C10                  | 4.1912  | 1.50203                                                                                                                                                          | -0.37866 |  |
| C11                  | 4.21764 | 1.46238                                                                                                                                                          | -0.45787 |  |
| C12                  | 4.28258 | 1.49295                                                                                                                                                          | -0.35756 |  |
| N13                  | 4.29456 | 1.55024                                                                                                                                                          | -0.23321 |  |
| Cu14                 | 4.37464 | 1.60927                                                                                                                                                          | -0.01617 |  |
| C15                  | 4.17877 | 1.3936                                                                                                                                                           | -0.56192 |  |
| C1                   | 4.03906 | 1.06972                                                                                                                                                          | -0.71884 |  |
| C2                   | 4.08412 | 1.14375                                                                                                                                                          | -0.68506 |  |
| C3                   | 4.13049 | 1.16848                                                                                                                                                          | -0.46219 |  |
| C4                   | 4.17011 | 1.23701                                                                                                                                                          | -0.41619 |  |
| C5                   | 4.16237 | 1.28233                                                                                                                                                          | -0.5843  |  |

**Table S2.** Unit cell parameters and fractional atomic coordinates of Cu-HABPB derived from structural optimization based on AA stacking with kgd topology.

| Space group          |         | <i>P6</i>                                                                                                                                                        |          |  |
|----------------------|---------|------------------------------------------------------------------------------------------------------------------------------------------------------------------|----------|--|
| Calculated unit cell |         | $a = 30.8000 \text{ \AA}, b = 30.8000 \text{ \AA},$<br>$c = 4.5549 \text{ \AA}$<br>$\alpha = 90.0000^\circ, \beta = 90.0000^\circ,$<br>$\gamma = 120.0000^\circ$ |          |  |
| Atoms                | X       | Y                                                                                                                                                                | Z        |  |
| C1                   | 4.94326 | 0.96637                                                                                                                                                          | -1.0363  |  |
| C2                   | 4.88391 | 0.93122                                                                                                                                                          | -1.00225 |  |
| C3                   | 4.84745 | 0.93802                                                                                                                                                          | -1.17388 |  |
| C4                   | 4.79253 | 0.90867                                                                                                                                                          | -1.11547 |  |
| C5                   | 4.77214 | 0.87053                                                                                                                                                          | -0.88946 |  |
| C6                   | 4.80723 | 0.8615                                                                                                                                                           | -0.71964 |  |
| C7                   | 4.86205 | 0.89105                                                                                                                                                          | -0.76481 |  |
| C8                   | 4.71495 | 0.84345                                                                                                                                                          | -0.80824 |  |
| C9                   | 4.684   | 0.86748                                                                                                                                                          | -0.86642 |  |
| C10                  | 4.63213 | 0.84538                                                                                                                                                          | -0.75386 |  |
| C11                  | 4.61035 | 0.79879                                                                                                                                                          | -0.58419 |  |
| C12                  | 4.64072 | 0.77394                                                                                                                                                          | -0.53235 |  |
| C13                  | 4.69254 | 0.79619                                                                                                                                                          | -0.64252 |  |
| N14                  | 4.55981 | 0.7803                                                                                                                                                           | -0.4429  |  |
| N15                  | 4.41649 | 0.67172                                                                                                                                                          | 0.13656  |  |
| C16                  | 4.45311 | 0.66818                                                                                                                                                          | -0.02884 |  |
| C17                  | 4.48558 | 0.71828                                                                                                                                                          | -0.14651 |  |
| C18                  | 4.46772 | 0.75154                                                                                                                                                          | -0.04126 |  |
| N19                  | 4.42525 | 0.7212                                                                                                                                                           | 0.1304   |  |
| Cu20                 | 4.38582 | 0.74629                                                                                                                                                          | 0.36847  |  |
| C21                  | 4.53431 | 0.73412                                                                                                                                                          | -0.31512 |  |
| C1                   | 4.94326 | 0.96637                                                                                                                                                          | -1.0363  |  |

**Table S3.** Summary of C<sub>2</sub>H<sub>2</sub> and CO<sub>2</sub> adsorption capacities and C<sub>2</sub>H<sub>2</sub>/CO<sub>2</sub> (50/50, v/v) IAST selectivities for various porous materials at 298 K and 100 kPa.

| Porous materials         | q, C <sub>2</sub> H <sub>2</sub><br>(cm <sup>3</sup> ·g <sup>-1</sup> ) | q, CO <sub>2</sub><br>(cm <sup>3</sup> ·g <sup>-1</sup> ) | C <sub>2</sub> H <sub>2</sub> /CO <sub>2</sub><br>selectivity | Refs.     |
|--------------------------|-------------------------------------------------------------------------|-----------------------------------------------------------|---------------------------------------------------------------|-----------|
| Cu-HAPB                  | 43.28                                                                   | 30.74                                                     | 6.23                                                          | This work |
| Cu-HABPB                 | 72.32                                                                   | 40.95                                                     | 3.39                                                          | This work |
| UPC-COF-1                | 89.8                                                                    | 45.5                                                      | 4.5                                                           | 3         |
| TPZ-COF                  | 107.21                                                                  | 63.42                                                     | 3.1                                                           | 4         |
| NUS-71                   | 42.4                                                                    | 10.3                                                      | 16                                                            | 5         |
| JUC-662                  | 65.1                                                                    | 31.2                                                      | 3.3                                                           | 6         |
| 2D sql COF               | 77.8                                                                    | 39.4                                                      | 4.8                                                           | 7         |
| Zn-btb-dmtrz             | 86.0                                                                    | 38.1                                                      | 2.7                                                           | 8         |
| FJU-90a                  | 180.0                                                                   | 103.0                                                     | 4.3                                                           | 9         |
| USTB-25-3D               | 77.28                                                                   | 39.23                                                     | 6.34                                                          | 10        |
| Cu <sup>I</sup> @MOF 303 | 193.4                                                                   | 114.6                                                     | 1.69                                                          | 11        |
| HOF-FJU-1                | 43                                                                      | 12.4                                                      | 3.46                                                          | 12        |
| KUF-5                    | 30.48                                                                   | 6.40                                                      | 4.8                                                           | 13        |

## References

1. Materials Studio; Accelrys: San Diego.
2. X. Li, J. Wang, F. Xue, Y. Wu, H. Xu, T. Yi and Q. Li, *Angew. Chem. Int. Ed.*, 2021, **133**, 2564-2570.
3. X. Wang, H. Liu, M. Sun, F. Gao, X. Feng, M. Xu, W. Fan and D. Sun, *Angew. Chem. Int. Ed.*, 2025, **137**, e202420801.
4. M. Yang, S. Qiao, J. Wang, P. Shi, and Z. Guo, *Small*, 2026, e12337.
5. Z. Zhang, C. Kang, S. Peh, D. Shi, F. Yang, Q. Liu, and D. Zhao, *J. Am. Chem. Soc.*, 2022, **144**, 14992-14996.
6. J. Zhang, H. Zheng, F. Chen, Z. Wang, H. Li, F. Sun, D. Zhao, V. Valtchev, S. Qiu and Q. Fang, *Angew. Chem. Int. Ed.*, 2025, **64**, e202500161.
7. L. Chen, C. Gong, X. Wang, F. Dai, M. Huang, X. Wu, C. Lu, and Y. Peng, *J. Am. Chem. Soc.*, 2021, **143**, 10243-10249.
8. C. Lu, S. Liu, Z. Wang, X. Wei, X. Chen, X. Wang, J. Pang, S. Geng, X. Lu, J. Duan, F. Dai and X. Bu, *Adv. Mater.*, 2026, **38**, e14488.
9. Y. Ye, Z. Ma, R. Lin, R. Krishna, W. Zhou, Q. Lin, Z. Zhang, S. Xiang and B. Chen, *J. Am. Chem. Soc.*, 2019, **141**, 4130-4136.
10. C. Jiang, C. Hao, X. Wang, H. Liu, X. Wei, H. Xu, Z. Wang, Y. Ouyang, W. Guo, F. Dai and D. Sun, *Chem. Eng. J.*, 2023, **453**, 139713.
11. Z. Jiang, W. Wang, W. Xue, H. Zhu, M. Zheng, H. Huang and C. Zhong, *Sep. Purif. Technol.*, 2023, **322**, 124345.
12. Y. Yang, H. Zhang, Z. Yuan, J. Wang, F. Xiang, L. Chen, F. Wei, S. Xiang, B. Chen, and Z. Zhang, *Angew. Chem. Int. Ed.*, 2022, **134**, e202207579.
13. Y. Lee, N. Kim, H. Yun, H. Kim, J. Choe and C. Hong, *ACS Appl. Mater. Interfaces.*, 2025, **17**, 45226-45233.
